# Supplementary material for: Bowman-Birk Inhibitor Mutants of Soybean Generated by CRISPR-Cas9 Reveal Drastic Reductions in Trypsin and Chymotrypsin Inhibitor Activities
Source: Preprints.org preprint supplement (doi:10.20944/preprints202405.1076.v1), 2024-05-16
Supplement: Supplementary file 3 [file supplementary]

**Bowman-Birk inhibitor mutants of soybean generated by CRISPR-Cas9 reveal drastic reductions in trypsin and chymotrypsin inhibitor activities**

**Won-Seok Kim 1, Jason D. Gillman 2, Sunhyung Kim3, Junqi Liu 4, Madhusudhana R. Janga5 , Robert M. Stupar6, Hari B. Krishnan 7***

**Supplementary Materials**

**
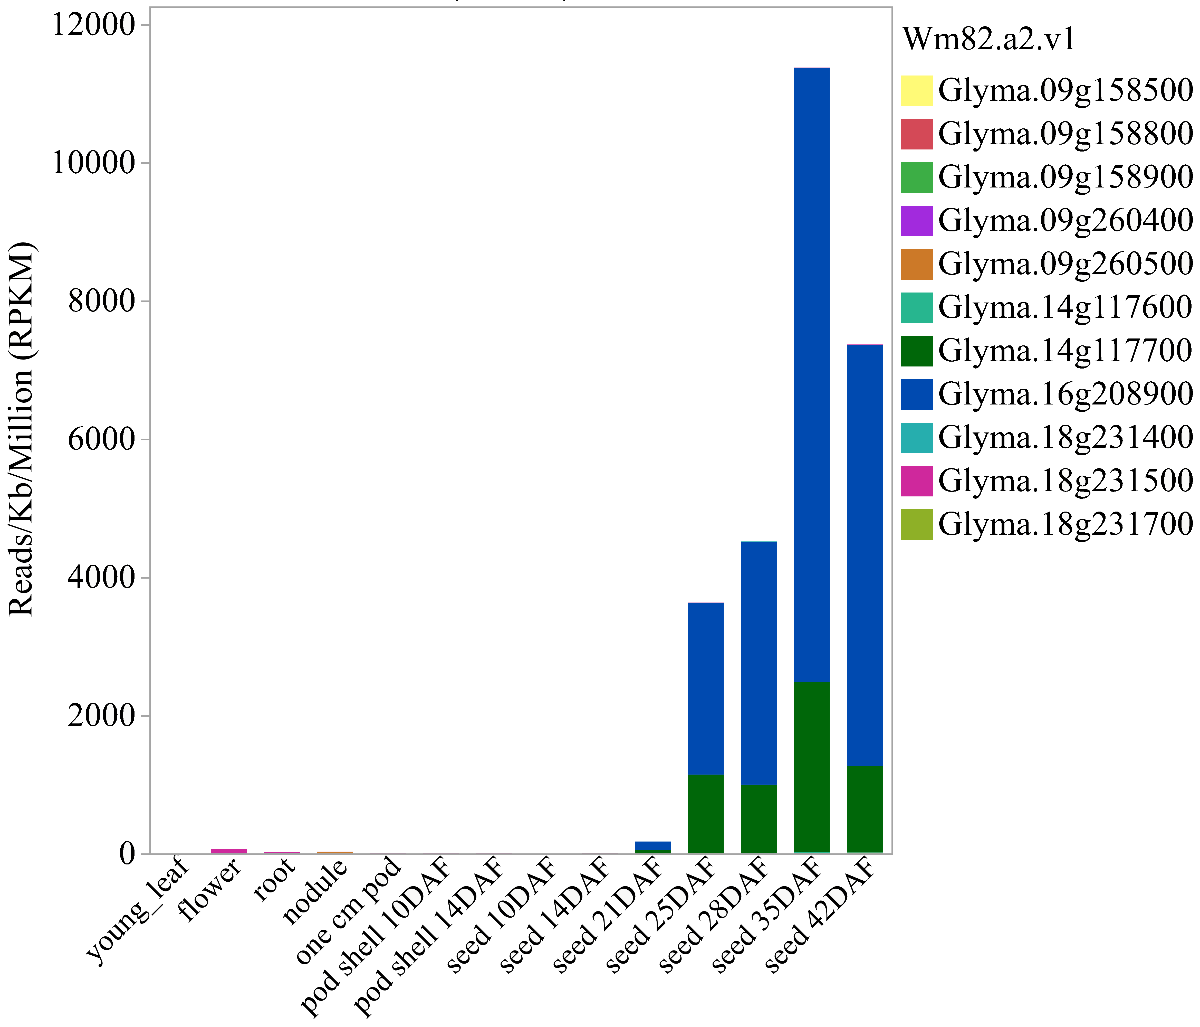
**

**Figure S1. Gene expression of BBi genes in soybean.** Data is repurposed from Severin et al. [20] using data housed on <https://soybase.org/soyseq/>. This RNAseq data was obtained from plant *P-C609-45-2-2*, a BC5F5 plant which was heterozygous for a seed protein QTL introgression from a *G. soja* (PI468916) into a *G. max* (A81-356022).


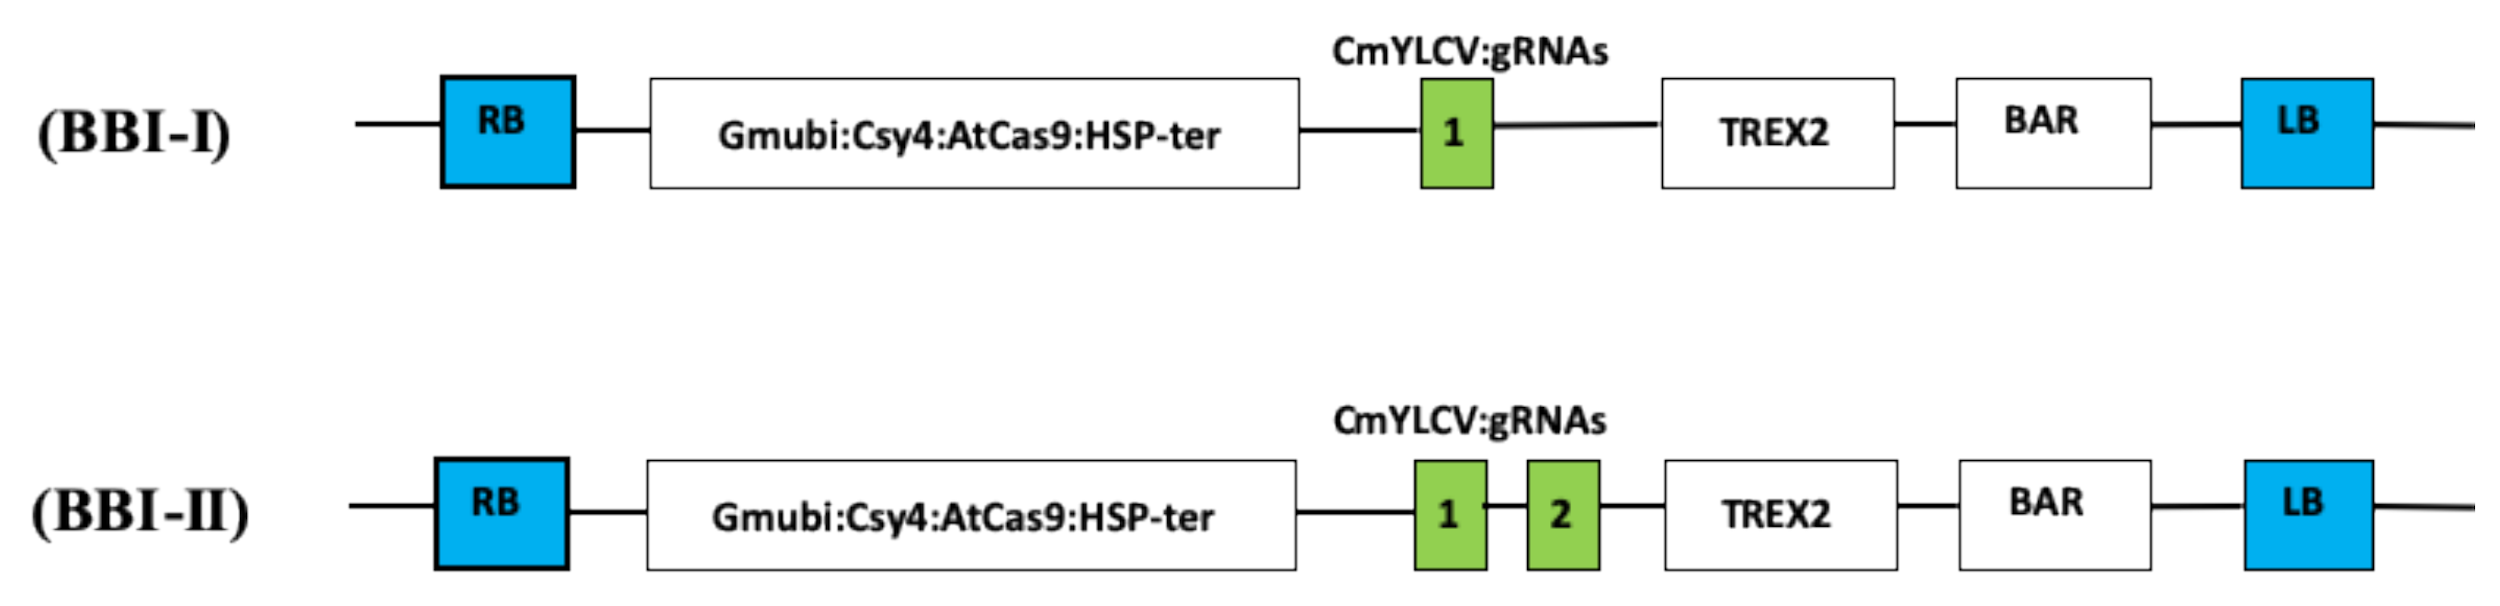


**Figure S2. CRISPR-Cas9 cassettes targeting BBi genes.** Events 5 was created using the BBi-II CRISPR-Cas9 construct and all other events were created through use of the BBi-I CRISPR-Cas9 construct.

**
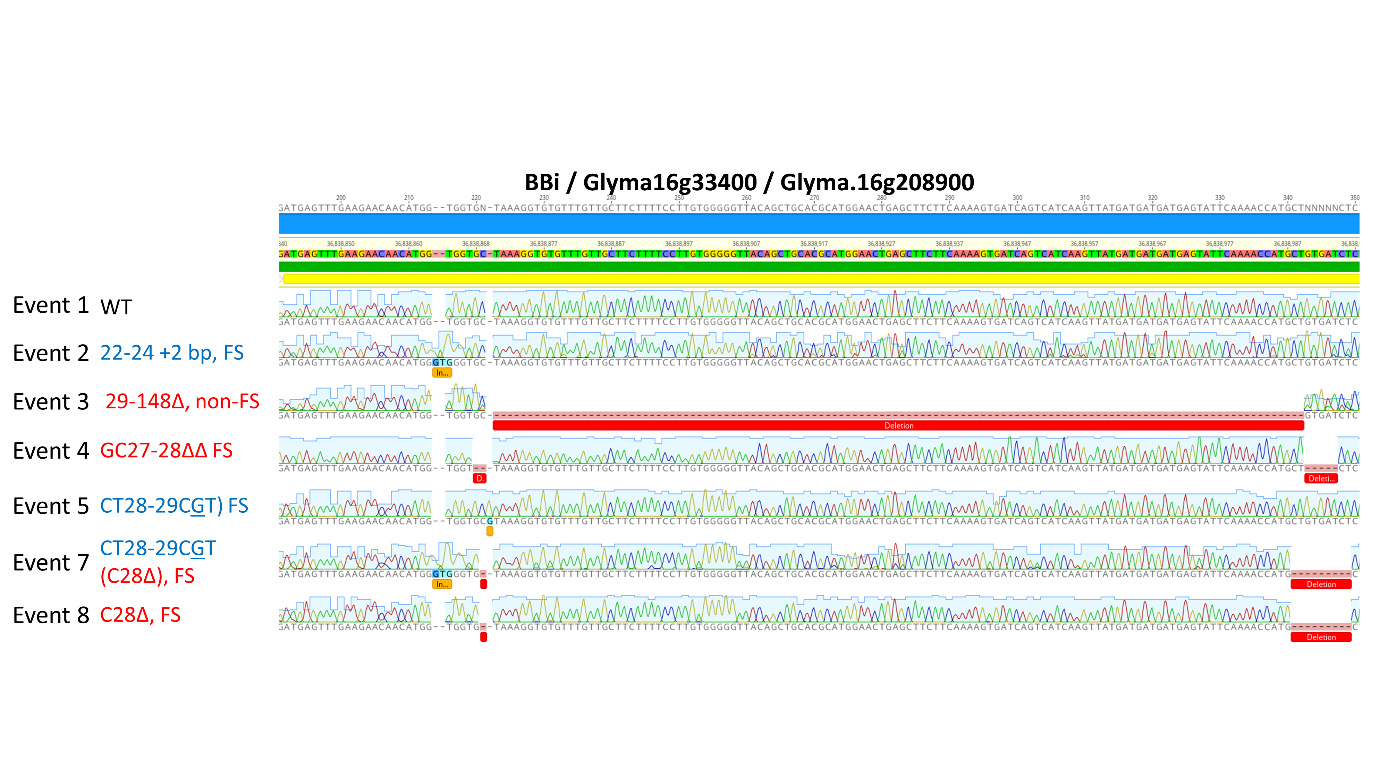
**

**
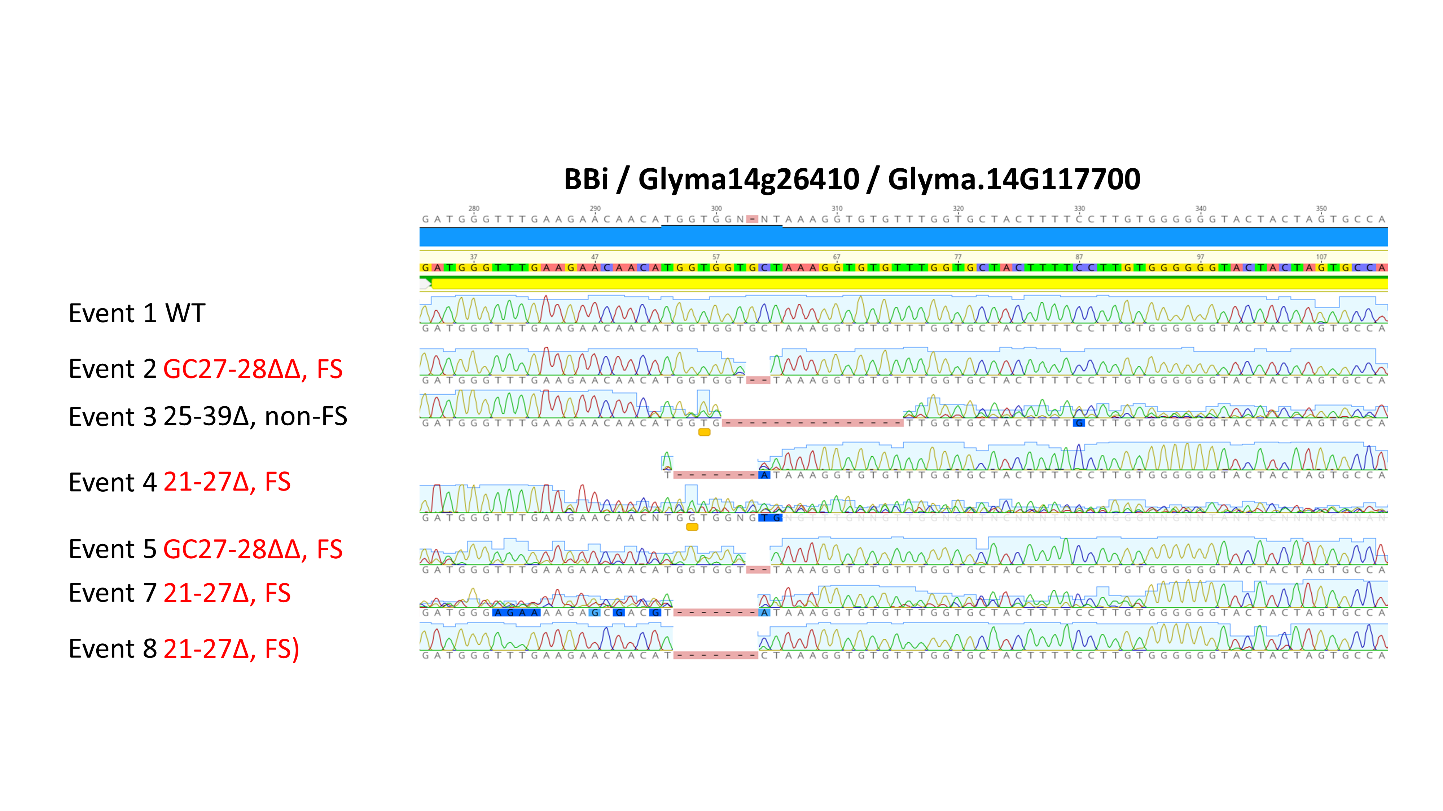
**

**Figure S3.** Sequencing traces for Glyma.16g208900 and Glyma.14G117700.

**Table S1.** Primers used for sequencing analysis and RT-PCR

| **Gene** | **Purpose** | **Primer name** | **Primer Sequence 5'- to -3'** |
| --- | --- | --- | --- |
| Glyma.16g208900 | PCR/sequencing | 16G208900_WGF1 | TAAATAACTCACTTCACGGGTTCT |
| Glyma.16g208900 | PCR/sequencing | 16G208900_WGR1 | TGAACACACAAGTCGCATGA |
| Glyma.14G117700 | PCR/sequencing | 14G117700_WGF1 | CAGTCATGATATCCTGCATGTGTG |
| Glyma.14G117700 | PCR/sequencing | 14G117700_WGR1 | CCCATTGGAGAGAGAGCTTACAT |
| Glyma.16g208900 | qRTPCR/sequencing | 09G158500_WGF1 | GAATTCGTGCCATTCAGCTTGCAAATC |
| Glyma.16g208900 | qRTPCR/sequencing | 09G158500_WGR1 | AACAAAGCATAAAGGGGGCTTTGTCCG |
| Glyma.14G117700 | qRTPCR/sequencing | 14F117700_WGF1 | GAATTCGTGCCATTCAGCTTGCAAATC |
| Glyma.16g208900 | qRTPCR/sequencing | 14F117700_WGR1 | ACAAAGCCTAAAGGGGGCTTTGCCCA |
| Glyma.16g208900 | qRTPCR/sequencing | 09G158600_WGF1 | AATTCATGTCACTCAGCTTGTGATCGC |
| Glyma.14G117700 | qRTPCR/sequencing | 09G158600_WGF1 | CCTAAAGGGCTTTGTTCATTTGAGAGAG |
| Glyma.16g208900 | qRTPCR/sequencing | 09G158700_WGF1 | AATTCATGTCACTCAGCTTGTGATCGC |
| Glyma.16g208900 | qRTPCR/sequencing | 09G158700_WGR1 | CCTAAAGGGCTTTGTTCATTTGAGAGAA |
| Glyma.14G117700 | qRTPCR/sequencing | 16G208900_WGF1 | AGCTTCTTCAAAAGTGATCAGTCATCAAGTTATG |
| Glyma.16g208900 | qRTPCR/sequencing | 16G208900_WGR1 | GGCTGTGAGCGTGTGCACATACAGCTC |
